# Supplementary material for: Nigrospora oryzae Causing Leaf Spot Disease on Chrysanthemum × morifolium Ramat and Screening of Its Potential Antagonistic Bacteria
Source: MDPI journal article supplement (doi:10.3390/microorganisms11092224), 2023-09-01
Supplement: s1 [file s1]

## Supplementary Material

**Table S1. GenBank accession numbers obtained in this study**

| No. | Strain | ITS      | TUB2     | TEF      |
|-----|--------|----------|----------|----------|
| 1   | JA     | OQ860097 | OQ921613 | OQ921610 |
| 2   | JE     | OQ860098 | OQ921614 | OQ921611 |
| 3   | JF     | OQ860099 | OQ921615 | OQ921612 |

**Table S2. Reference sequences of *Nigrospora* Species from GenBank used in phylogenetic analysis**

| No. | Species                      | Culture collection Number | ITS      | TUB2     | TEF1     | Host Plant                   |
|-----|------------------------------|---------------------------|----------|----------|----------|------------------------------|
| 1   | <i>N. aurantiaca</i>         | CGMCC 3.18130* = LC 7302  | KX986064 | KY019465 | KY019295 | <i>Nelumbo sp.</i>           |
| 2   | <i>N. aurantiaca</i>         | LC 7034                   | KX986093 | KY019598 | KY019394 | <i>Musa paradisiaca</i>      |
| 3   | <i>N. bambusae</i>           | CGMCC 3.18327* = LC 7114  | KY385307 | KY385319 | KY385313 | <i>Bamboo</i>                |
| 4   | <i>N. bambusae</i>           | LC 7244                   | KY385306 | KY385320 | KY385314 | <i>Bamboo</i>                |
| 5   | <i>N. bambusae</i>           | LC 7245                   | KY385305 | KY385321 | KY385315 | <i>Bamboo</i>                |
| 6   | <i>N. camelliae-sinensis</i> | LC 2710                   | KX985957 | KY019484 | KY019310 | <i>Castanopsis sp.</i>       |
| 7   | <i>N. camelliae-sinensis</i> | CGMCC 3.18125* = LC 3500  | KX985986 | KY019460 | KY019293 | <i>Camellia sinensis</i>     |
| 8   | <i>N. camelliae-sinensis</i> | LC 4460                   | KX986015 | KY019538 | KY019353 | <i>Castanopsis sp.</i>       |
| 9   | <i>N. camelliae-sinensis</i> | LC 6304                   | KX986045 | KY019566 | KY019370 | <i>Camellia sinensis</i>     |
| 10  | <i>N. camelliae-sinensis</i> | LC 6984                   | KX986080 | KY019587 | KY019387 | <i>Musa paradisiaca</i>      |
| 11  | <i>N. camelliae-sinensis</i> | LC 6989                   | KX986083 | KY019590 | KY019453 | <i>Musa paradisiaca</i>      |
| 12  | <i>N. camelliae-sinensis</i> | LC12070                   | MN215773 | MN329937 | MN264012 | <i>Saccharum officinarum</i> |
| 13  | <i>N. chinensis</i>          | LC 2696                   | KX985947 | KY019474 | KY019424 | <i>Lindera aggregata</i>     |
| 14  | <i>N. chinensis</i>          | LC 3085                   | KX985970 | KY019497 | KY019427 | <i>Camellia sinensis</i>     |
| 15  | <i>N. chinensis</i>          | LC 4364                   | KX986011 | KY019534 | KY019435 | <i>Aucuba japonica</i>       |

|    |                            |                            |          |          |          |                              |
|----|----------------------------|----------------------------|----------|----------|----------|------------------------------|
| 16 | <i>N. chinensis</i>        | LC 4433                    | KX986013 | KY019536 | KY019436 | <i>Castanopsis sp.</i>       |
| 17 | <i>N. chinensis</i>        | LC 4565                    | KX986021 | KY019544 | KY019442 | <i>Itea sp.</i>              |
| 18 | <i>N. chinensis</i>        | CGMCC 3.18127* = LC 4575   | KX986023 | KY019462 | KY019422 | <i>Machilus breviflora</i>   |
| 19 | <i>N. chinensis</i>        | LC 4619                    | KX986025 | KY019547 | KY019444 | <i>Osmanthus sp.</i>         |
| 20 | <i>N. chinensis</i>        | LC 4660                    | KX986026 | KY019548 | KY019445 | <i>Quercus sp.</i>           |
| 21 | <i>N. chinensis</i>        | LC 4673                    | KX986028 | KY019550 | KY019446 | <i>Smilax ocreata</i>        |
| 22 | <i>N. chinensis</i>        | LC 6631                    | KX986043 | KY019569 | KY019448 | <i>Camellia sinensis</i>     |
| 23 | <i>N. chinensis</i>        | LC 6972                    | KX986078 | KY019585 | KY019451 | <i>Musa paradisiaca</i>      |
| 24 | <i>N. falsivesicularis</i> | CGMCC 3.19678* = LC12067 T | MN215778 | MN329942 | MN264017 | <i>Saccharum officinarum</i> |
| 25 | <i>N. falsivesicularis</i> | LC13553                    | MN215779 | MN329943 | MN264018 | <i>Saccharum officinarum</i> |
| 26 | <i>N. gorlenkoana</i>      | CBS 480.73*                | KX986048 | KY019456 | KY019420 | <i>Vitis vinifera</i>        |
| 27 | <i>N. gorlenkoana</i>      | JZB 3230001                | MN495939 | MN549381 | MN544645 | <i>Cirsium setosum</i>       |
| 28 | <i>N. guilinensis</i>      | CGMCC 3.18124* = LC 3481   | KX985983 | KY019459 | KY019292 | <i>Camellia sinensis</i>     |
| 29 | <i>N. guilinensis</i>      | LC 7301                    | KX986063 | KY019608 | KY019404 | <i>Vitis vinifera</i>        |
| 30 | <i>N. hainanensis</i>      | CGMCC 3.18129* = LC 7030   | KX986091 | KY019464 | KY019415 | <i>Musa paradisiaca</i>      |
| 31 | <i>N. hainanensis</i>      | LC 6979                    | KX986079 | KY019586 | KY019416 | <i>Musa paradisiaca</i>      |
| 32 | <i>N. hainanensis</i>      | LC13514                    | MN215780 | MN329944 | MN264019 | <i>Saccharum officinarum</i> |
| 33 | <i>N. laticolonia</i>      | CGMCC 3.18123* = LC 3324   | KX985978 | KY019458 | KY019291 | <i>Camellia sinensis</i>     |
| 34 | <i>N. laticolonia</i>      | LC 7009                    | KX986087 | KY019594 | KY019454 | <i>Musa paradisiaca</i>      |
| 35 | <i>N. laticolonia</i>      | LC12059                    | MN215783 | MN329947 | MN264022 | <i>Saccharum officinarum</i> |
| 36 | <i>N. musae</i>            | CBS 319.34*                | KX986076 | KY019455 | KY019419 | <i>Musa paradisiaca</i>      |
| 37 | <i>N. musae</i>            | LC 6385                    | KX986042 | KY019567 | KY019371 | <i>Camellia sinensis</i>     |
| 38 | <i>N. oryzae</i>           | LC 6759                    | KX986054 | KY019572 | KY019374 | <i>Oryza sativa</i>          |
| 39 | <i>N. oryzae</i>           | LC 6760                    | KX986055 | KY019573 | KY019375 | <i>Oryza sativa</i>          |
| 40 | <i>N. oryzae</i>           | LC 7293                    | KX985931 | KY019601 | KY019396 | <i>Nelumbo sp.</i>           |
| 41 | <i>N. oryzae</i>           | LC 7297                    | KX985936 | KY019605 | KY019400 | <i>Nelumbo sp.</i>           |

|    |                      |                          |          |          |          |                                 |
|----|----------------------|--------------------------|----------|----------|----------|---------------------------------|
| 42 | <i>N. oryzae</i>     | LC 2689                  | KX985942 | KY019469 | KY019423 | <i>Rhododendron sp.</i>         |
| 43 | <i>N. oryzae</i>     | LC 2693                  | KX985944 | KY019471 | KY019299 | <i>Neolitsea sp.</i>            |
| 44 | <i>N. oryzae</i>     | LC 2695                  | KX985946 | KY019473 | KY019301 | <i>Rubus reflexus</i>           |
| 45 | <i>N. oryzae</i>     | LC 2699                  | KX985949 | KY019476 | KY019303 | <i>Hamamelis mollis</i>         |
| 46 | <i>N. oryzae</i>     | LC 2707                  | KX985954 | KY019481 | KY019307 | <i>Rhododendron simiarum</i>    |
| 47 | <i>N. oryzae</i>     | LC 2712                  | KX985958 | KY019485 | KY019311 | <i>Castanopsis sp.</i>          |
| 48 | <i>N. oryzae</i>     | LC 2724                  | KX985959 | KY019486 | KY019312 | <i>Symplocos zizyphoides</i>    |
| 49 | <i>N. oryzae</i>     | LC 2749                  | KX985962 | KY019489 | KY019315 | <i>Ternstroemia sp.</i>         |
| 50 | <i>N. oryzae</i>     | LC 2752                  | KX985963 | KY019490 | KY019316 | <i>Osmanthus sp.</i>            |
| 51 | <i>N. oryzae</i>     | LC 2972                  | KX985967 | KY019494 | KY019320 | <i>Tutcheria microcarpa</i>     |
| 52 | <i>N. oryzae</i>     | LC 2991                  | KX985969 | KY019496 | KY019321 | <i>Cleyera japonica</i>         |
| 53 | <i>N. oryzae</i>     | LC 4273                  | KX985995 | KY019519 | KY019336 | <i>Cephalotaxus sinensis</i>    |
| 54 | <i>N. oryzae</i>     | LC 4294                  | KX986002 | KY019526 | KY019343 | <i>Daphniphyllum macropodum</i> |
| 55 | <i>N. oryzae</i>     | LC 4338                  | KX986008 | KY019532 | KY019349 | <i>Camellia sp.</i>             |
| 56 | <i>N. oryzae</i>     | LC 4680                  | KX986030 | KY019552 | KY019357 | <i>Camellia sinensis</i>        |
| 57 | <i>N. oryzae</i>     | LC 4961                  | KX986031 | KY019553 | KY019358 | <i>Pittosporum illicioides</i>  |
| 58 | <i>N. oryzae</i>     | LC 5181                  | KX986032 | KY019554 | KY019359 | <i>Pentactina rupicola</i>      |
| 59 | <i>N. osmanthi</i>   | CGMCC 3.18126* = LC 4350 | KX986010 | KY019461 | KY019421 | <i>Osmanthus sp.</i>            |
| 60 | <i>N. osmanthi</i>   | LC 4487                  | KX986017 | KY019540 | KY019438 | <i>Hedera nepalensis</i>        |
| 61 | <i>N. pyriformis</i> | CGMCC 3.18122* = LC 2045 | KX985940 | KY019457 | KY019290 | <i>Citrus sinensis</i>          |
| 62 | <i>N. pyriformis</i> | LC 2688                  | KX985941 | KY019468 | KY019297 | <i>Lindera aggregata</i>        |
| 63 | <i>N. pyriformis</i> | LC 2690                  | KX985943 | KY019470 | KY019298 | <i>Rosa sp.</i>                 |
| 64 | <i>N. pyriformis</i> | LC 2694                  | KX985945 | KY019472 | KY019300 | <i>Rubus reflexus</i>           |
| 65 | <i>N. pyriformis</i> | LC 3099                  | KX985971 | KY019498 | KY019322 | <i>Camellia sinensis</i>        |
| 66 | <i>N. pyriformis</i> | LC 4669                  | KX986027 | KY019549 | KY019355 | <i>Castanopsis sp.</i>          |
| 67 | <i>N. pyriformis</i> | LC 6985                  | KX986081 | KY019588 | KY019388 | <i>Musa paradisiaca</i>         |

|          |                                   |                          |           |          |          |                              |
|----------|-----------------------------------|--------------------------|-----------|----------|----------|------------------------------|
| 68       | <i>N. pyriformis</i>              | LC12075                  | MN215787  | MN329988 | MN264026 | <i>Saccharum officinarum</i> |
| 69       | <i>N. rubi</i>                    | CGMCC 3.18326* = LC 2698 | KX985948  | KY019475 | KY019302 | <i>Rubus sp.</i>             |
| 70       | <i>N. sphaerica</i>               | LC 7294                  | KX985932  | KY019602 | KY019397 | <i>Nelumbo sp.</i>           |
| 71       | <i>N. sphaerica</i>               | LC 2705                  | KX985952  | KY019479 | KY019305 | <i>Rosa sp.</i>              |
| 72       | <i>N. sphaerica</i>               | LC 2839                  | KX985964  | KY019491 | KY019317 | <i>Harpullia longipetala</i> |
| 73       | <i>N. sphaerica</i>               | LC 2958                  | KX985966  | KY019493 | KY019319 | <i>Cleyera japonica</i>      |
| 74       | <i>N. sphaerica</i>               | LC 3420                  | KX985980  | KY019506 | KY019325 | <i>Camellia sinensis</i>     |
| 75       | <i>N. sphaerica</i>               | LC 4174                  | KX985989  | KY019513 | KY019330 | <i>Rhododendron arboreum</i> |
| 76       | <i>N. sphaerica</i>               | LC 4241                  | KX985990  | KY019514 | KY019331 | <i>Deutzia sp.</i>           |
| 77       | <i>N. sphaerica</i>               | LC 6969                  | KX986077  | KY019584 | KY019386 | <i>Musa paradisiaca</i>      |
| 78       | <i>N. sphaerica</i>               | PC KS4A1 C R2            | MK408581  | MK408565 | MK408570 | <i>Hylocereus polyrhizus</i> |
| 79       | <i>N. vesicularis</i>             | CGMCC 3.18128* = LC 7010 | KX986088  | KY019463 | KY019294 | <i>Musa paradisiaca</i>      |
| 80       | <i>N. vesicularis</i>             | LC 0322                  | KX985939  | KY019467 | KY019296 | <i>Unknown host plant</i>    |
| 81       | <i>N. vesicularifera</i>          | CGMCC 3.19333* = LC12052 | MN215812  | MN329975 | MN264051 | <i>Saccharum officinarum</i> |
| 82       | <i>N. vesicularifera</i>          | LC13532                  | MN215813  | MN329976 | MN264052 | <i>Saccharum officinarum</i> |
| 83       | <i>N. zimmermanii</i>             | CBS 290.62*              | KY385309  | KY385317 | KY385311 | <i>Saccharum officinarum</i> |
| 84       | <i>N. zimmermanii</i>             | CBS 984.69               | KY385310  | KY385322 | KY385316 | <i>Saccharum officinarum</i> |
| 85       | <i>N. zimmermanii</i>             | LC12048                  | MN215818  | MN329981 | MN264057 | <i>Saccharum officinarum</i> |
| Outgroup | <i>Arthrinium<br/>malaysianum</i> | CBS 102053               | NR_120273 | KF144988 | KF145030 |                              |

**Table S3. Hosts of the disease caused by genus *Nigrospora* and report places**

| 编号 | Species                       | Host                                                                                                                                     | Location                                | Longitude                 | Latitude | Reference          |
|----|-------------------------------|------------------------------------------------------------------------------------------------------------------------------------------|-----------------------------------------|---------------------------|----------|--------------------|
| 1  | <i>Nigrospora sphaerica</i>   | <i>Chrysanthemum morifolium</i>                                                                                                          | Tong xiang, Zhejiang Province, China    | 120.79                    | 31.09    | (Luo et al., 2022) |
| 2  | <i>Nigrospora laticolonia</i> | <i>Hylocereus polyrhizus</i>                                                                                                             | Port Dickson, Negeri Sembilan, Malaysia | 101.8                     | 2.52     | (Kee et al., 2019) |
| 3  |                               |                                                                                                                                          | Kluang, Johor, Malaysia                 | 103.33                    | 2.03     |                    |
| 4  | <i>Nigrospora sphaerica</i>   |                                                                                                                                          | Port Dickson, Negeri Sembilan, Malaysia | 101.85                    | 2.52     |                    |
| 5  |                               |                                                                                                                                          | Kluang, Johor, Malaysia                 | 103.38                    | 2.03     |                    |
| 6  | <i>Nigrospora gorlenkoana</i> |                                                                                                                                          | Cirsium setosum                         | Shandong Peninsula, China | 117      |                    |
| 7  | <i>Nigrospora oryzae</i>      | <i>Phyllostachys nigra</i> ,<br><i>Rudbeckia hirta</i> , <i>Scirpus sp.</i>                                                              | Shandong Peninsula, China               | 117.05                    | 36.65    |                    |
| 8  | <i>Nigrospora osmanthi</i>    | <i>Rosa chinensis</i> , <i>Phragmites australis</i> , <i>Cirsium setosum</i> ,<br><i>Phyllostachys nigra</i> ,<br><i>Rudbeckia hirta</i> | Shandong Peninsula, China               | 117.1                     | 36.65    |                    |
| 9  | <i>Nigrospora rubi</i>        | <i>Fraxinus sp.</i>                                                                                                                      | Shandong Peninsula, China               | 117.15                    | 36.65    |                    |
| 10 | <i>Nigrospora sphaerica</i>   | <i>Cirsium setosum</i> , <i>Phragmites australis</i> , <i>Fraxinus sp.</i>                                                               | Shandong Peninsula, China               | 117.2                     | 36.65    |                    |
| 11 | <i>Nigrospora aurantiaca</i>  | <i>Castanea mollissima</i>                                                                                                               | Dechang, Sichuan Province, China        | 102.17                    | 27.4     | (Luo et al., 2020) |
| 12 |                               |                                                                                                                                          | Yanyuan, Sichuan Province, China        | 101.51                    | 27.42    |                    |

|    |                                 |                                  |                                                        |        |       |                       |
|----|---------------------------------|----------------------------------|--------------------------------------------------------|--------|-------|-----------------------|
| 13 | <i>Nigrospora sphaerica</i>     | <i>Sesamum indicum</i>           | Faisalabad, Punjab, Pakistan                           | 73.07  | 31.43 | (Rehman et al., 2022) |
| 14 | <i>Nigrospora sp.</i>           | <i>Actinidia deliciosa</i>       | Sacheon, South Korea                                   | 128    | 35    | (Kwon et al., 2017)   |
| 15 | <i>Nigrospora lacticolonina</i> | <i>Bougainvillea spectabilis</i> | Yongxing Island of Sansha City, Hainan Province, China | 112.3  | 16.8  | (Li et al., 2022)     |
| 16 | <i>Nigrospora sphaerica</i>     | <i>Phoenix dactylifera</i>       | Basra Province, Philippines                            | 121.97 | 6.7   | (Abass et al., 2013)  |
| 17 | <i>Nigrospora osmanthi</i>      | <i>Ficus pandurata</i>           | Suyang, Jiangsu Province, China                        | 118.77 | 34.13 | (Liu et al., 2019)    |
| 18 | <i>Nigrospora guilinensis</i>   | <i>Phellodendron chinense</i>    | Dujiangyan, Sichuan Province, China                    | 103.62 | 30.98 | (Zeng et al., 2020)   |
| 19 |                                 |                                  | Dayi, Sichuan Province, China                          | 103.52 | 30.58 |                       |
| 20 | <i>Nigrospora sphaerica</i>     | <i>Phoenix dactylifera</i>       | Lahore, Pakistan                                       | 74.36  | 31.55 | (Alam et al., 2020)   |
| 21 | <i>Nigrospora pyriformis</i>    | <i>Chenopodium album</i>         | Hezhang, Guizhou Province, China                       | 104.64 | 27.08 | (Chen et al., 2020)   |
| 22 | <i>Nigrospora oryzae</i>        | <i>Phaseolus vulgaris</i>        | Longli, Guizhou Province, China                        | 106.8  | 26.27 | (Luo and Jiang, 2022) |
| 23 | <i>Nigrospora aurantiaca</i>    | <i>Nicotiana tabacum</i>         | Zhengan, Guizhou Province, China                       | 107.43 | 28.55 | (Huang et al., 2021)  |
| 24 | <i>Nigrospora oryzae</i>        | <i>Nelumbo nucifera</i>          | Fuzho, Fujian Province, China                          | 119.28 | 26.08 | (Zhang et al., 2018)  |
| 25 | <i>Nigrospora osmanthi</i>      | <i>Fagopyrum tataricum</i>       | Xiangxiang, Hunan Province, China                      | 112.53 | 27.73 | (Shen et al., 2021)   |
| 26 | <i>Nigrospora oryzae</i>        | <i>Photinia serrulata</i>        | Guiyang, Guizhou Province, China                       | 106.65 | 20.44 | (He et al., 2019)     |
| 27 | <i>Nigrospora pyriformis</i>    | <i>Nelumbo nucifera</i>          | Guangchang, Jiangxi Province, China                    | 116.31 | 26.79 | (Gong et al., 2022)   |

|    |                               |                                     |                                      |        |       |                              |
|----|-------------------------------|-------------------------------------|--------------------------------------|--------|-------|------------------------------|
| 28 | <i>Nigrospora oryzae</i>      | <i>Arachis hypogaea</i>             | Mekkalur, Thiruvannamalai, India     | 79.08  | 12.23 | (Vijayalakshmi et al., 2022) |
| 29 | <i>Nigrospora osmanthi</i>    | <i>Stenotaphrum secundatum</i>      | Haikou, Hainan Province, China       | 110.32 | 20.05 | (Mei et al., 2019)           |
| 30 | <i>Nigrospora sphaerica</i>   | <i>Cyclocarya paliurus</i>          | Anhui Province, China                | 117.29 | 30.24 | (Zheng et al., 2021)         |
| 31 |                               |                                     | Guangxi Province, China              | 109.92 | 26.02 |                              |
| 32 |                               |                                     | Hubei Province, China                | 111.33 | 30.43 |                              |
| 33 |                               |                                     | Nanjing, Jiangsu Province, China     | 118.82 | 32.08 |                              |
| 34 | <i>Nigrospora sphaerica</i>   | <i>Arachis hypogaea</i>             | Wenchang, Hainan Province, China     | 110.76 | 19.62 | (Liu et al., 2020)           |
| 35 | <i>Nigrospora hainanensis</i> | <i>Oxalis corymbosa</i>             | Nanning, Guangxi Province, China     | 108.32 | 22.82 | (Zheng et al., 2022)         |
| 36 | <i>Nigrospora sphaerica</i>   | <i>Glycyrrhiza glabra</i>           | Udaipur, India                       | 73.68  | 24.58 | (Verma and Gupta, 2008)      |
| 37 | <i>Nigrospora sphaerica</i>   | <i>Camellia oleifera</i>            | Shexian, Anhui Province, China       | 118.42 | 29.86 | (Liu et al., 2020)           |
| 38 | <i>Nigrospora sphaerica</i>   | <i>Saccharum spp.</i>               | Guangzhou, Guangdong Province, China | 113.23 | 23.16 | (Cui et al., 2018)           |
| 39 | <i>Nigrospora oryzae</i>      | <i>Zingiber officinale</i>          | Nanning, Guangxi Province, China     | 108.07 | 23.24 | (Liu et al., 2022)           |
| 40 | <i>Nigrospora oryzae</i>      | <i>Calibrachoa hybrida</i>          | Hurlingham, Argentina                | -58.4  | -34.6 | (Borrelli et al., 2020)      |
| 41 | <i>Nigrospora oryzae</i>      | <i>Centranthera cochinchinensis</i> | Pingbian, Yunnan Province, China     | 103.76 | 23.05 | (Zhai et al., 2019)          |
| 42 | <i>Nigrospora oryzae</i>      | <i>Vaccinium corymbosum</i>         | Shanghai City, China                 | 121.47 | 31.23 | (Zhang et al., 2019)         |
| 43 | <i>Nigrospora sphaerica</i>   | <i>Morus alba</i>                   | Mysuru, India                        | 76.63  | 12.26 | (Arunakumar et al., 2019)    |
| 44 | <i>Nigrospora oryzae</i>      | <i>Commelina communis</i>           | Dianjiang, Chongqing City, China     | 107.3  | 30.06 | (Qiu et al., 2022)           |

|    |                                 |                                                       |                                      |        |        |                              |
|----|---------------------------------|-------------------------------------------------------|--------------------------------------|--------|--------|------------------------------|
| 45 | <i>Nigrospora osmanthi</i>      | <i>Orthosiphon stamineus</i>                          | Serdang, Selangor, Malaysia          | 101.72 | 3      | (Ismail et al., 2022)        |
| 46 | <i>Nigrospora oryzae</i>        | <i>Triticum aestivum</i>                              | Astana Province, Kazakhstan          | 71.47  | 51.16  | (Eken et al., 2016)          |
| 47 | <i>Nigrospora oryzae</i>        | <i>Bassia scoparia</i>                                | Punjab Province, Pakistan            | 74.21  | 31.33  | (Anjum et al., 2021)         |
| 48 | <i>Nigrospora lacticolonina</i> | <i>Phoenix dactylifera</i>                            | Oman                                 | 58.62  | 23.6   | (Al-Nadabi et al., 2020)     |
| 49 | <i>Nigrospora sphaerica</i>     | <i>Adenium obesum</i>                                 | Goiânia, Goiás state, Brazil         | -49.29 | -16.67 | (de Jesus et al., 2020)      |
| 50 | <i>Nigrospora sphaerica</i>     | <i>Passiflora edulis</i>                              | Huishui, Guizhou Province, China     | 106.83 | 106.5  | (Wang et al., 2022)          |
| 51 | <i>Nigrospora oryzae</i>        | <i>Oryza rufipogon</i>                                | Zhanjinag, Guangdong Province, China | 109.79 | 20.93  | (Liu et al., 2021)           |
| 52 | <i>Nigrospora sphaerica</i>     | <i>Selenicereus megalanthus</i>                       | Sabah, Malaysia                      | 116.29 | 5.35   | (Khoo et al., 2022)          |
| 53 | <i>Nigrospora sphaerica</i>     | <i>Heliocarpus americanus</i>                         | Beltrão, Paraná, Brazil              | -52.27 | -23.8  | (Bernardi et al., 2021)      |
| 54 | <i>Nigrospora oryzae</i>        | <i>Populus alba</i> L. × <i>P. berolinensis</i> Dipp. | Shenyang, Liaoning Province, China   | 123.57 | 41.82  | (Zhang et al., 2022)         |
| 55 | <i>Nigrospora oryzae</i>        | <i>Davidia involucrata</i>                            | Meigu, Sichuan Province, China       | 103.23 | 28.55  | (Yang et al., 2022)          |
| 56 | <i>Nigrospora sphaerica</i>     | <i>Platycodon grandiflorus</i>                        | Anhui Province, China                | 115.42 | 33.13  | (Chen et al., 2022)          |
| 57 | <i>Nigrospora chinensis</i>     | <i>Camellia oleifera</i>                              | Tianzhu, Guizhou Province, China     | 109.21 | 26.91  | (Qin et al., 2021)           |
| 58 | <i>Nigrospora sphaerica</i>     | <i>Citrullus lanatus</i>                              | Serdang, Selangor, Malaysia          | 101.77 | 3      | (Ismail and Abd Razak, 2021) |
| 59 | <i>Nigrospora oryzae</i>        | <i>Pennisetum purpureum</i>                           | Fengdu, Chongqing City, China        | 107.73 | 29.86  | (Han et al., 2020)           |



|    |                                |                                |                                        |        |       |                          |
|----|--------------------------------|--------------------------------|----------------------------------------|--------|-------|--------------------------|
| 60 | <i>Nigrospora sphaerica</i>    | <i>Eclipta prostrata</i>       | Dianjiang, Chongqing City, China       | 107.35 | 30.06 | (Qiu et al., 2022)       |
| 61 | <i>Nigrospora sphaerica</i>    | <i>Vigna unguiculata</i>       | Karnataka, India                       | 77.57  | 12.97 | (Deepika et al., 2021)   |
| 62 | <i>Nigrospora sphaerica</i>    | <i>Cunninghamia lanceolata</i> | Qingyang County, Anhui Province, China | 117.84 | 36.64 | (Xu et al., 2017)        |
| 63 | <i>Nigrospora oryzae</i>       | <i>Gossypium hirsutum</i>      | Alabama, America                       | -86.33 | 32.37 | (Palmateer et al., 2003) |
| 64 | <i>Nigrospora oryzae</i>       | <i>Nicotiana tabacum</i>       | Tongren, Guizhou province, China       | 108.12 | 27.99 | (Wang et al., 2022)      |
| 65 | <i>Nigrospora aurantiaca</i>   | <i>Saccharum officinarum</i>   | Chongzuo, Guangxi Province, China      | 107.36 | 22.37 | (Raza et al., 2019)      |
| 66 |                                |                                | Guilin, Guangxi Province, China        | 110.3  | 25.27 |                          |
| 67 |                                |                                | Laibin, Guangxi Province, China        | 109.23 | 23.73 |                          |
| 68 | <i>Nigrospora sinensis</i>     |                                | Chongzuo, Guangxi Province, China      | 107.41 | 22.37 |                          |
| 69 |                                |                                | Nanning, Guangxi Province, China       | 108.37 | 22.82 |                          |
| 70 |                                |                                | Guangzhou, Guangdong Province, China   | 113.23 | 23.16 |                          |
| 71 | <i>Nigrospora gorlenkoana</i>  |                                | Liuzhou, Guangxi Province, China       | 109.42 | 24.33 |                          |
| 72 | <i>Nigrospora lacticolonia</i> |                                | Chongzuo, Guangxi Province, China      | 107.31 | 22.37 |                          |
| 73 |                                |                                | Nanning, Guangxi Province, China       | 108.42 | 22.84 |                          |

|    |                               |                             |                                        |        |       |                       |
|----|-------------------------------|-----------------------------|----------------------------------------|--------|-------|-----------------------|
| 74 |                               |                             | Guangzhou, Guangdong province, China   | 113.18 | 23.18 |                       |
| 75 |                               |                             | Zhanjiang, Guangdong Province, China   | 109.81 | 20.95 |                       |
| 76 | <i>Nigrospora oryzae</i>      |                             | Liuzhou, Guangxi Province, China       | 109.44 | 24.35 |                       |
| 77 |                               |                             | Baise, Guangxi Province, China         | 106.62 | 23.89 |                       |
| 78 |                               |                             | Fangchenggang, Guangxi Province, China | 108.2  | 21.37 |                       |
| 79 |                               |                             | Guilin, Guangxi Province, China        | 110.35 | 25.29 |                       |
| 80 |                               |                             | Hechi, Guangxi Province, China         | 108.06 | 24.69 |                       |
| 81 |                               |                             | Laibin, Guangxi Province, China        | 109.28 | 23.75 |                       |
| 82 | <i>Nigrospora sphaerica</i>   |                             | Liuzhou, Guangxi Province, China       | 109.49 | 24.35 |                       |
| 83 |                               |                             | Nanning, Guangxi Province, China       | 108.27 | 22.84 |                       |
| 84 |                               |                             | Guangzhou, Guangdong Province, China   | 113.33 | 23.2  |                       |
| 85 | <i>Nigrospora vesicularis</i> |                             | Laibin, Guangxi Province, China        | 109.18 | 23.73 |                       |
| 86 | <i>Nigrospora sphaerica</i>   | <i>Mentha canadensis</i>    | Chengmai, Hainan Province, China       | 119.29 | 29.48 | (Sun et al., 2020)    |
| 87 | <i>Nigrospora oryzae</i>      | <i>Hibiscus mutabilis</i>   | Chengdu, Sichuan Province, China       | 103.86 | 30.71 | (Han et al., 2021)    |
| 88 | <i>Nigrospora sphaerica</i>   | <i>Vaccinium corymbosum</i> | Buenos Aires Province, Argentina       | -59    | -33   | (Wright et al., 2008) |
| 89 |                               |                             | Entre Ríos Province, Argentina         | -38    | -11   |                       |

|     |                             |                                 |                                        |        |       |                       |
|-----|-----------------------------|---------------------------------|----------------------------------------|--------|-------|-----------------------|
| 90  | <i>Nigrospora sphaerica</i> | <i>Akebia trifoliata</i>        | Zhangjiajie, Hunan Province, China     | 110.2  | 29.4  | (Hong et al., 2021)   |
| 91  | <i>Nigrospora sphaerica</i> | <i>Parthenium hysterophorus</i> | Perak, Malaysia                        | 101.09 | 4.59  | (Zafri et al., 2021)  |
| 92  | <i>Nigrospora oryzae</i>    | <i>Costus speciosus</i>         | Chengmai, Hainan Province, China       | 119.29 | 29.48 | (Sun et al., 2021)    |
| 93  | <i>Nigrospora oryzae</i>    | <i>Poa pratensis</i>            | Ontario, Canada                        | -80.25 | 44.55 | (Zheng et al., 2012)  |
| 94  | <i>Nigrospora sphaerica</i> | <i>Morus alba</i>               | Santai, Sichuan Province, China        | 105.08 | 31.1  | (Chen et al., 2018)   |
| 95  | <i>Nigrospora oryzae</i>    | <i>Aloe vera</i>                | Dhaka, Bangladesh                      | 90.41  | 23.81 | (Begum et al., 2018)  |
| 96  | <i>Nigrospora sphaerica</i> | <i>Lagenaria siceraria</i>      | Sumter County, Georgia                 | -84.23 | 32.07 | (Li et al., 2016)     |
| 97  | <i>Nigrospora oryzae</i>    | <i>Arundo donax</i>             | France                                 | 2.42   | 48.87 | (Widmer et al., 2006) |
| 98  |                             |                                 | Crete                                  | 24.53  | 35.42 |                       |
| 99  |                             |                                 | Cyprus                                 | 33.38  | 35.17 |                       |
| 100 |                             |                                 | Italy                                  | 12.5   | 42.8  |                       |
| 101 |                             |                                 | Morocco                                | -6.84  | 34.02 |                       |
| 102 |                             |                                 | Spain                                  | -3.75  | 40.42 |                       |
| 103 | <i>Nigrospora oryzae</i>    | <i>Aloe vera</i>                | Faisalabad , Punjab Province, Pakistan | 73.09  | 31.42 | (Alam et al., 2017)   |
| 104 | <i>Nigrospora oryzae</i>    | <i>Actinidia deliciosa</i>      | Taishun, Zhejiang Province, China      | 119.72 | 27.57 | (Li et al., 2018)     |
| 105 |                             |                                 | Liupanshui, Guizhou Province, China    | 104.83 | 26.59 |                       |
| 106 | <i>Nigrospora sphaerica</i> | <i>Camellia sinensis</i>        | Darjeeling, India                      | 88.26  | 27.04 | (Dutta et al., 2015)  |

|     |                              |                                                                                |                                     |        |       |                      |
|-----|------------------------------|--------------------------------------------------------------------------------|-------------------------------------|--------|-------|----------------------|
| 107 | <i>Nigrospora oryzae</i>     | <i>Euonymus japonicas</i>                                                      | Nanyang, Henan Province, China      | 112.55 | 33    | (Xu et al., 2022)    |
| 108 | <i>Nigrospora sphaerica</i>  | <i>Hylocereus undatus</i>                                                      | Guangdong Province, China           | 110.01 | 21.01 | (Liu et al., 2016)   |
| 109 | <i>Nigrospora oryzae</i>     | <i>Dendrobium candidum</i>                                                     | Hangzhou, Zhejiang Province, China  | 120.19 | 30.26 | (Wu et al., 2014)    |
| 110 | <i>Nigrospora sphaerica</i>  | <i>Actinidia sp.</i>                                                           | Taishun, Zhejiang Province, China   | 119.77 | 27.57 | (Li et al., 2018)    |
| 111 |                              |                                                                                | Liupanshui, Guizhou Province, China | 104.88 | 26.59 |                      |
| 112 | <i>Nigrospora sphaerica</i>  | <i>Wisteria sinensis</i>                                                       | Hatay, Turkey                       | 36.25  | 36.42 | (Soylu et al., 2011) |
| 113 | <i>Nigrospora sphaerica</i>  | <i>Curcuma longa</i>                                                           | Ruian, Zhejiang Province, China     | 120.65 | 27.78 | (Zhang et al., 2011) |
| 114 | <i>Nigrospora sphaerica</i>  | <i>Camellia sinensis</i>                                                       | Qingyang, Anhui Province, China     | 117.89 | 30.65 | (Liu et al., 2016)   |
| 115 | <i>Nigrospora oryzae</i>     | <i>Aloe vera</i>                                                               | Wuhan, Hubei Province, China        | 114.29 | 30.58 | (Zhai et al., 2013)  |
| 116 | <i>Nigrospora oryzae</i>     | <i>Gossypium hirsutum</i>                                                      | Qianshan, Anhui Province, China     | 117.7  | 28.32 | (Zhang et al., 2012) |
| 117 | <i>Nigrospora aurantiaca</i> | <i>Pandanus amaryllifolius</i>                                                 | Luyang, Sabah, Malaysia             | 112.3  | 2.3   | (Khoo et al., 2022)  |
| 118 | <i>Nigrospora sphaerica</i>  | <i>Cenchrus purpureus</i> Schumach., syn. <i>Pennisetum purpureum</i> Schumach | Chongqing City, China               | 106.33 | 29.35 | (Han et al., 2019)   |
| 119 | <i>Nigrospora oryzae</i>     | <i>Oryza sativa</i>                                                            | Jilin, Jilin Province, China        | 126.67 | 43.33 | (Sun and Bai, 2018)  |
| 120 |                              |                                                                                | Dehui, Jinlin Province, China       | 125.23 | 44.53 |                      |
| 121 |                              |                                                                                | Tonghua, Jilin Province, China      | 125.94 | 41.73 |                      |

|     |                              |                                     |                                            |        |       |                          |
|-----|------------------------------|-------------------------------------|--------------------------------------------|--------|-------|--------------------------|
| 122 | <i>Nigrospora oryzae</i>     | <i>Oryza sativa</i>                 | Harbin, Heilongjiang Province, China       | 126.52 | 45.8  | (Zhao et al., 2022)      |
| 123 |                              |                                     | kiamusze, Heilongjiang Province, China     | 130.34 | 46.82 |                          |
| 124 |                              |                                     | Suihua, Heilongjiang Province, China       | 126.99 | 46.66 |                          |
| 125 |                              |                                     | Jiansanjiang, Heilongjiang Province, China | 132.63 | 47.26 |                          |
| 126 | <i>Nigrospora oryzae</i>     | <i>Oryza sativa</i>                 | Yangjiang, Guangdong Province, China       | 111.98 | 21.86 | (Feng et al., 2013)      |
| 127 |                              |                                     | Shaoguan, Guangdong Province, China        | 113.61 | 24.68 |                          |
| 128 |                              |                                     | Dongguan, Guangdong Province, China        | 113.75 | 23.02 |                          |
| 129 |                              |                                     | Guangzhou, Guangdong Province, China       | 113.59 | 23.55 |                          |
| 130 | <i>Nigrospora oryzae</i>     | <i>Fagopyrum esculentum</i>         | Huize, Yunnan Province, China              | 103.3  | 26.42 | (Lu et al., 2022)        |
| 131 | <i>Nigrospora sphaerica</i>  | <i>Mangifera indica</i>             | El Sharkia governorate, Egypt              | 31.8   | 30.8  | (Youssef et al., 2022)   |
| 132 | <i>Nigrospora musae</i>      | <i>Basella alba</i>                 | Shuangfeng, Hunan Province, China          | 111.95 | 27.69 | (Liao et al., 2023)      |
| 133 | <i>Nigrospora oryzae</i>     | <i>Dioscorea spp.</i>               | Nanjing, Jiangsu Province, China           | 118.87 | 32.08 | (Lu et al., 2023)        |
| 134 | <i>Nigrospora sphaerica</i>  | <i>Crossandra infundibuliformis</i> | Mysore, India                              | 76.65  | 12.3  | (Tejaswini et al., 2022) |
| 135 | <i>Nigrospora aurantiaca</i> | <i>Arachis hypogaea</i>             | Laixi, Shandong Province, China            | 120.52 | 36.89 | (He et al., 2022)        |

|     |                         |                       |                                  |       |       |                    |
|-----|-------------------------|-----------------------|----------------------------------|-------|-------|--------------------|
| 136 | <i>Nigrospora musae</i> | <i>Zinnia elegans</i> | Shibing, Guizhou Province, China | 108.2 | 27.52 | (Liu et al., 2022) |
|-----|-------------------------|-----------------------|----------------------------------|-------|-------|--------------------|

Table 3 was used to draw a map of the diseases caused by the genus *Nigrospora* reported worldwide in recent years. The references were collected from Web of Science and CNKI. The coordinates of the disease occurrence place were from the reference or obtained from search in Internet according the occurrence location in references. When multiple data appear at the same coordinate point, the coordinate value were fine tuned to avoid overlap points on the map. The map in this paper was draw using ggplot2, ggmap, maps and maptools libraries of R (version 4.1.2).
